# Supplementary material for: Ultrasonically Prepared Sodium Heparin-Stabilized Indocyanine Green/Nano-Hydroxyapatite Suspension for Collaborative Photodynamic and Photothermal Tumor Therapy
Source: MDPI journal article supplement (doi:10.3390/cryst13091387), 2023-09-18
Supplement: s1 [file s1]

Archive with 1 entries (1 files):
- crystals-2605095-supplementary.pdf
