# Supplementary material for: Ultrasonically Prepared Sodium Heparin-Stabilized Indocyanine Green/Nano-Hydroxyapatite Suspension for Collaborative Photodynamic and Photothermal Tumor Therapy
Source: MDPI journal article supplement (doi:10.3390/cryst13091387), 2023-09-18
Supplement: s1 [file s1 › crystals-2605095-supplementary.pdf]

# **Ultrasonically Prepared Sodium Heparin-Stabilized Indocyanine Green/Nano-Hydroxyapatite Suspension for Collaborative Tumor Therapy**

Qifa Song,<sup>1</sup> Zi-You Ding,<sup>1</sup> Chengyu Li,<sup>1</sup> Yiran Fan,<sup>1</sup> Xinli Tang,<sup>1</sup> Yingchao Han<sup>1\*</sup>

<sup>1</sup>State Key Laboratory of Advanced Technology for Materials Synthesis and Processing, Biomedical Materials and Engineering Research Center of Hubei Province, Wuhan University of Technology, Wuhan 430070, China

\*Corresponding author, hanyingchao@whut.edu.cn

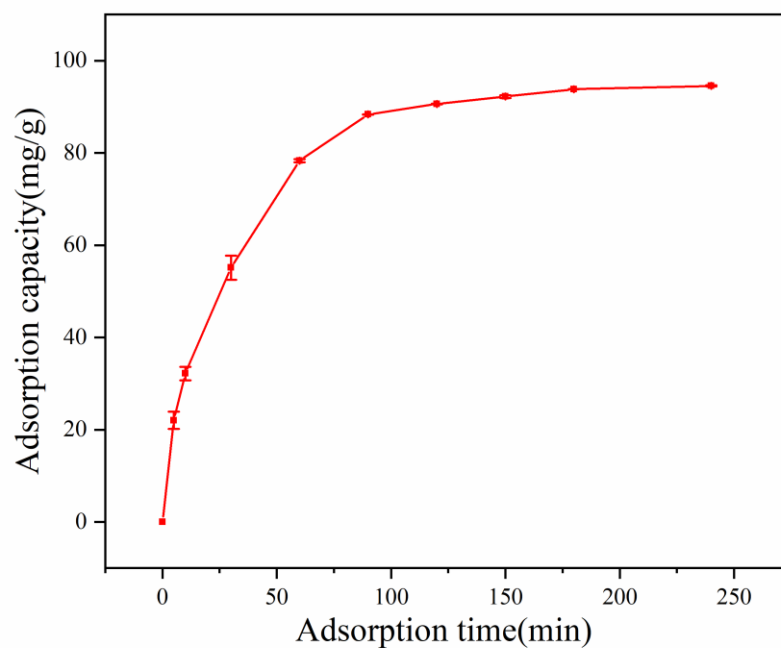

**Figure. S1.** Changes in the adsorption capacity of ICG with the adsorption time.

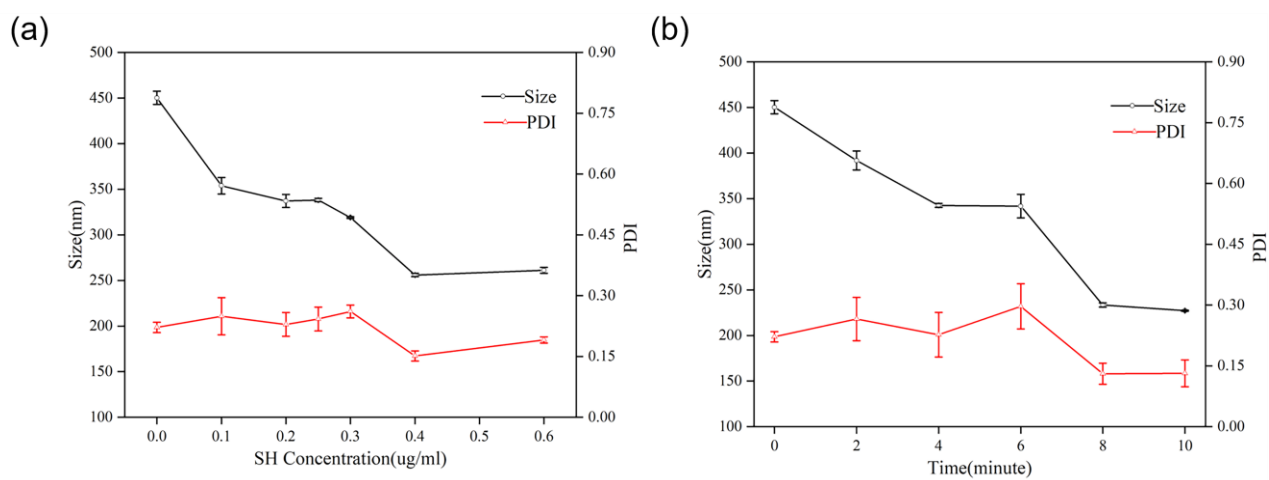

**Figure. S2.** Different parameters (SH concentration (b) and ultrasonic time (c)), the PDI and the size of SH-ICG/nHAP are shown.

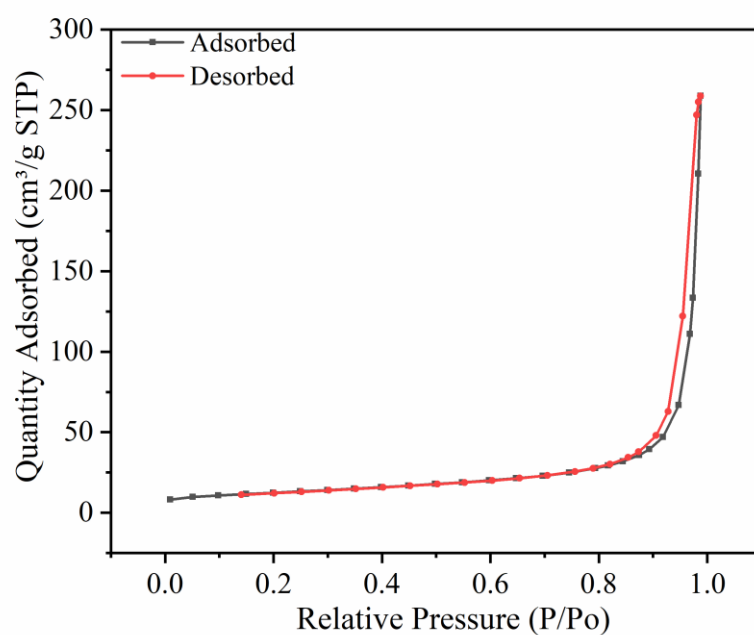

**Figure. S3.** N<sub>2</sub> adsorption-desorption of nHAP.

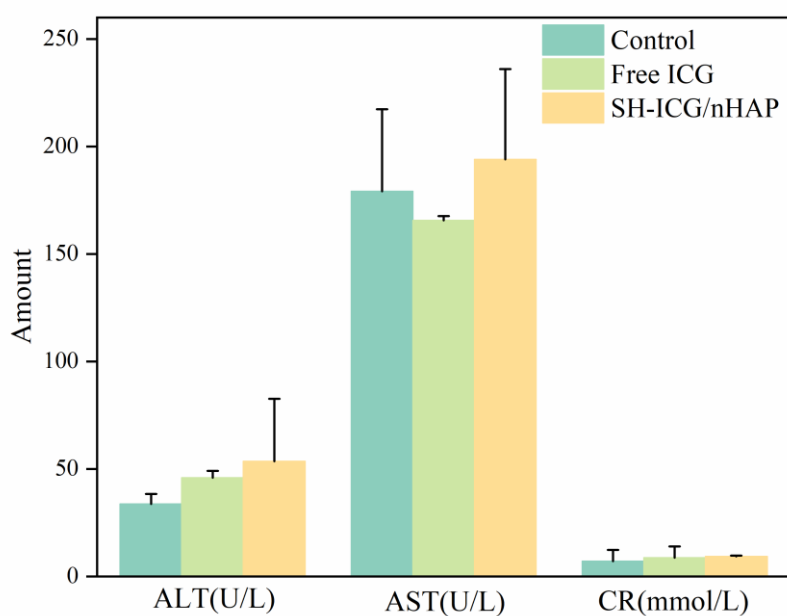

**Figure. S4.** Blood biochemistry analysis (ALT, AST, and CREA) of tumor-bearing mice in different groups.

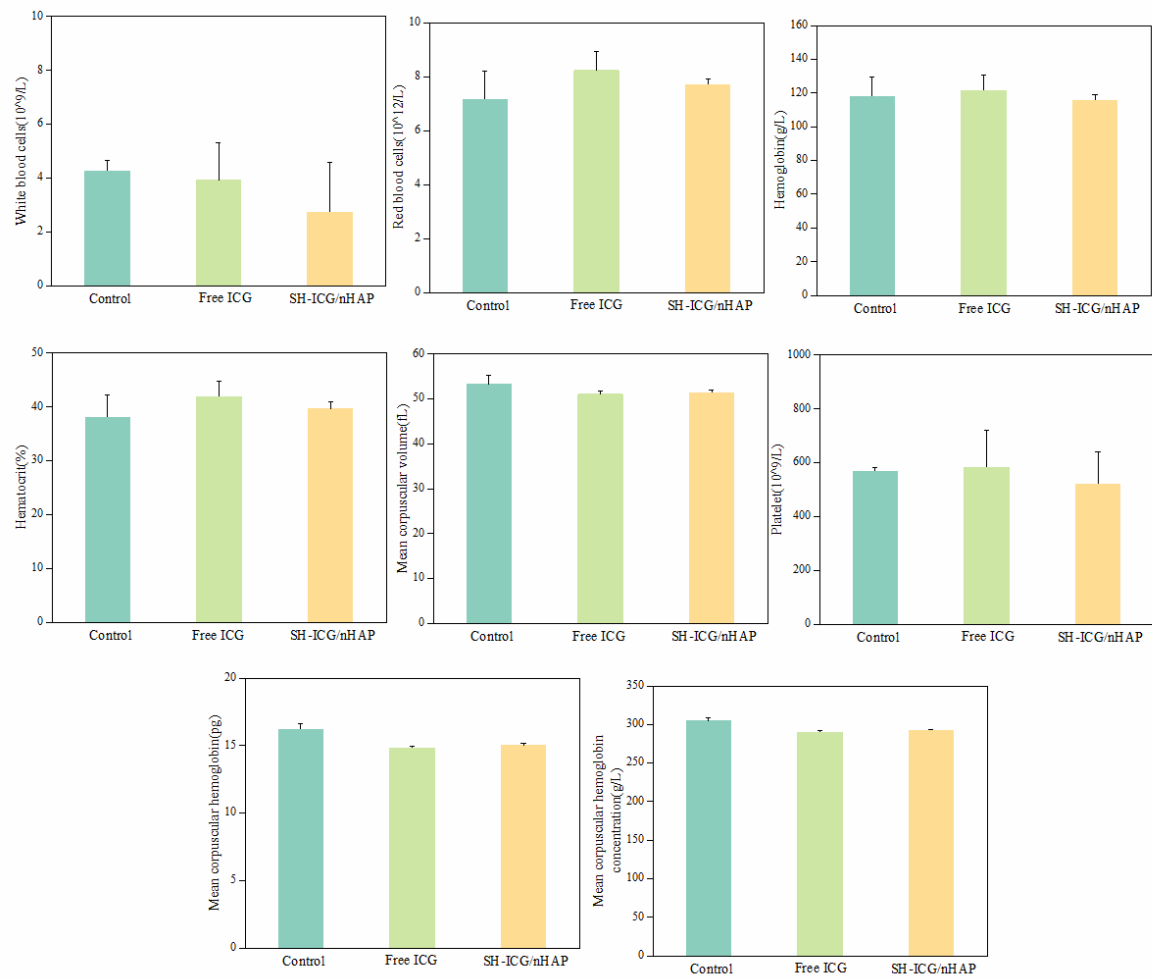

**Figure. S5.** Blood analysis of tumor-bearing mice in different groups.
